# Supplementary material for: Predictive thermodynamics for condensed phases
Source: Royal Society of Chemistry journal article supplement (doi:10.1039/b501741f), 2005-01-01
Supplement: b501741f-examples.pdf [file b501741f-examples.pdf]

## **Predictive Thermodynamics for Condensed Phases**

*Leslie Glasser*\*

Nanochemistry Research Institute, Dept. of Applied Chemistry, Curtin University of  
Technology, GPO Box U1987, Perth WA, 6845, Australia

Telephone: +61 8 6293-1202      Fax: +61 8 9266-4699

E-mail: [l.glasser@exchange.curtin.edu.au](mailto:l.glasser@exchange.curtin.edu.au)

and

*H. Donald Brooke Jenkins*\*

Department of Chemistry, University of Warwick, Coventry CV4 7AL, West  
Midlands, United Kingdom

Telephone: +44 2476 523-265; +44 2476 466747      Fax: +44 2476 466-747

E-mail: [Don.Jenkins@warwick.ac.uk](mailto:Don.Jenkins@warwick.ac.uk)

\*Corresponding authors

## Supplementary Information

### Examples of the Application of VBT

*Note: Numeric equation numbers refer to equations in the main text.*

Examples are here provided to illustrate the use of ion additivity, the isomegetic rule<sup>R1</sup> and equation (12), and to show the versatility of VBT for tackling practical synthetic as well as pedagogical problems. All of them, in the absence of the VBT initiative, would be difficult to tackle quantitatively.

### Use of VBT to probe the thermodynamic stability / instability of hypothetical materials

#### Dioxygen dioxygenyl, O<sub>4</sub>

Consider the following question: *Just how thermodynamically unstable is the hypothetical solid allotrope of dioxygen, dioxygenyl superoxide, O<sub>2</sub><sup>+</sup>O<sub>2</sub><sup>-</sup> relative to the stable (gaseous) form of oxygen?*

This is best considered from the standpoint of a thermochemical cycle:

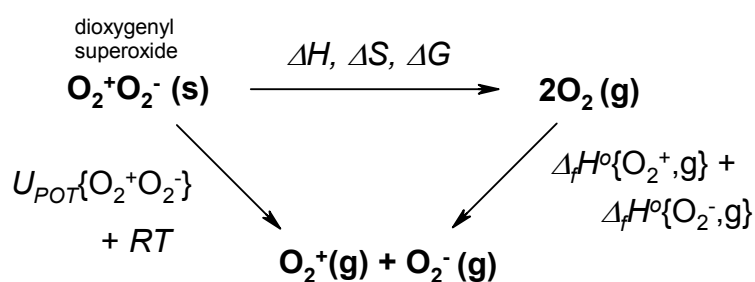

for which:

$$\Delta H \approx U_{POR}\{O_2^+O_2^-\} + RT - \Delta_f H^\circ\{O_2^+, g\} - \Delta_f H^\circ\{O_2^-, g\} \quad (S1)$$

and

$$\Delta S \approx 2 S^\circ_{298}\{O_2, g\} - S^\circ_{298}\{O_2^+O_2^-, s\} \quad (S2)$$

and since, from standard tables:<sup>R2</sup>  $\Delta_f H^\circ \{O_2^+, g\} / \text{kJ mol}^{-1} = 1170.9 (\pm 0.9)$ ;

$\Delta_f H^\circ \{O_2^-, g\} / \text{kJ mol}^{-1} = -48.6 (\pm 0.8)$  and  $S^\circ_{298} \{O_2, g\} / \text{J K}^{-1} \text{mol}^{-1} = 205.147$

( $\pm 0.005$ ), then:

$$\Delta H / \text{kJ mol}^{-1} \approx U_{POT} \{O_2^+ O_2^-\} - 1119.8 (\pm 1.2) \quad (\text{S3})$$

and

$$\Delta S / \text{J K}^{-1} \text{mol}^{-1} \approx 410.3 - S^\circ_{298} \{O_2^+ O_2^-, s\} \quad (\text{S4})$$

VBT thermodynamics can now provide the rest of the data required. From our database:<sup>R3</sup>  $V \{O_2^+\} / \text{nm}^3 = 0.015 (\pm 0.011)$ ;  $V \{O_2^-\} / \text{nm}^3 = 0.046 (\pm 0.007)$  and hence

$V_m \{O_2^+ O_2^-\} / \text{nm}^3 = 0.061 (\pm 0.013)$  for the 1:1 salt  $O_2^+ O_2^-$ , for which  $2I = v|z+z_-| =$

$2(1)(1) = 2$  (equation (10)), hence  $I = 1$ , then (equation (12)):  $U_{POT} \{O_2^+ O_2^-\} = 2[\alpha$

$/V_m \{O_2^+ O_2^-\}^{1/3} + \beta]$  where  $\alpha = 117.3 \text{ kJ mol}^{-1} \text{ nm}$  and  $\beta = 51.9 \text{ kJ mol}^{-1}$  leading to

$U_{POT} \{O_2^+ O_2^-\} / \text{kJ mol}^{-1} \approx 700 (\pm 37)$  and hence to  $\Delta H / \text{kJ mol}^{-1} \approx -419.8 (\pm 37)$ .

$S^\circ_{298} \{O_2^+ O_2^-, s\} / \text{J K}^{-1} \text{mol}^{-1}$  can be estimated from equation (6) and is approximated

by  $1360 \{V_m \{O_2^+ O_2^-\} / \text{nm}^3\} + 15 = 1360 \{0.061 (\pm 0.013)\} + 15 = 98.0 (\pm 17.7) \text{ J K}^{-1}$

$\text{mol}^{-1}$  and thus:  $\Delta S / \text{J K}^{-1} \text{mol}^{-1} \approx 312.3 (\pm 17.7) \text{ J K}^{-1} \text{mol}^{-1}$ , hence, at 298K,  $T \Delta S \approx$

$0.298 \{312.3 (\pm 17.7)\} = 93.1 (\pm 5.3) \text{ kJ mol}^{-1}$ .  $\Delta G = \Delta H - T \Delta S$ , and then  $\Delta G \approx -419.8$

$(\pm 37) - 93.1 (\pm 5.2) \approx -512.9 (\pm 37.4) \text{ kJ mol}^{-1}$  indicating that *considerable*

*thermodynamic instability* is possessed by this solid oxygen allotrope,  $O_2^+ O_2^-$ . This

arises both from the enthalpic difference between the solid and the gaseous forms and

the high entropy possessed by 2 moles of  $O_2(g)$ . It should be noted here that use of

Hofmann's elemental volumes<sup>R4</sup> (Table 2) leads to  $V_m \{O_2^+ O_2^-\} / \text{nm}^3 = [4 \{11.39$

$(\pm 0.17)] / 1000 = 0.0456 (\pm 0.0003)$  which, although within the standard deviation

quoted above, is likely to be less reliable since Hofmann recommends taking account

of local environment when estimating volumes involving the atoms C, H, N, O and F.

### Solid Ammonium Hydroxide, NH<sub>4</sub>OH(s)

A similar exercise might be to use VBT to show why ammonium hydroxide does not exist in the solid form and that the thermodynamic instability of this solid form of NH<sub>4</sub>OH(s) is of the order of -135 kJ mol<sup>-1</sup> with respect to NH<sub>3</sub>(g) and H<sub>2</sub>O(g).

[ $V_m\{\text{NH}_4\text{OH}\} \approx 0.053 (\pm 0.023) \text{ nm}^3$ ;  $I = 1$ ,  $U_{\text{POT}}\{\text{NH}_4\text{OH}\} \approx 728 (\pm 70) \text{ kJ mol}^{-1}$ ;  $\Delta H$  for the reaction:  $\text{NH}_4\text{OH}(\text{s}) \rightarrow \text{NH}_3(\text{g}) + \text{H}_2\text{O}(\text{g})$  is estimated to be  $\approx -47.2 (\pm 70.5) \text{ kJ mol}^{-1}$ ;  $S^\circ_{298}\{\text{NH}_4\text{OH}, \text{s}\} \approx 1360 V_m\{\text{NH}_4\text{OH}\} + 15 \approx 87.1 (\pm 31.2) \text{ J K}^{-1} \text{ mol}^{-1}$  leading to  $\Delta S / \text{J K}^{-1} \text{ mol}^{-1} \approx 294.5 (\pm 31.2) \text{ kJ mol}^{-1}$  and, hence,  $\Delta G / \text{kJ mol}^{-1} \approx -135.0 (\pm 71.1) \text{ kJ mol}^{-1}$ ].

### Synthetic Problem: formation of LiSb<sub>2</sub>F<sub>11</sub>(s)

The reaction of LiF(s) and SbF<sub>5</sub>(l) in 1:1 mole ratio is known to yield LiSbF<sub>6</sub>(s): can this be rationalized? Would doubling the mole ratio of SbF<sub>5</sub>(l) be likely to (thermodynamically) favour the formation of LiSb<sub>2</sub>F<sub>11</sub>(s)?

The two reactions involved are:

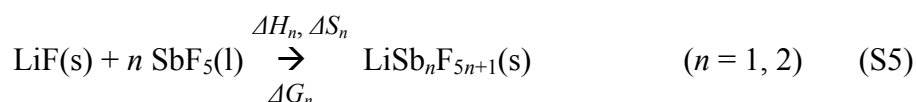

Consider first the case where  $n = 1$ :

$$\Delta H_1 / \text{kJ mol}^{-1} = \Delta_f H^\circ\{\text{LiSbF}_6, \text{s}\} - \Delta_f H^\circ\{\text{LiF}, \text{s}\} - \Delta_f H^\circ\{\text{SbF}_5, \text{l}\} \quad (\text{S6})$$

Burgess, Peacock and Sherry<sup>R5</sup> have prepared LiSbF<sub>6</sub> and measured  $\Delta_f H^\circ\{\text{LiSbF}_6, \text{s}\} = -2\,062 \text{ kJ mol}^{-1}$ . Thus,  $\Delta H_1$  can be calculated (via eq.S6) to be  $-118 \text{ kJ mol}^{-1}$  (since<sup>R5</sup>  $\Delta_f H^\circ\{\text{SbF}_5, \text{l}\} = -1\,328 \text{ kJ mol}^{-1}$  and  $\Delta_f H^\circ\{\text{LiF}, \text{s}\} = -615.9 \text{ kJ mol}^{-1}$ ). Similarly, since  $S^\circ_{298}\{\text{LiF}, \text{s}\} = 35.6 \text{ J K}^{-1} \text{ mol}^{-1}$  and  $S^\circ_{298}\{\text{SbF}_5, \text{l}\} = 265 \text{ J K}^{-1} \text{ mol}^{-1}$ , then:

$$\begin{aligned} \Delta S_1 / \text{J K}^{-1} \text{ mol}^{-1} &= S^\circ_{298}\{\text{LiSbF}_6, \text{s}\} - S^\circ_{298}\{\text{LiF}, \text{s}\} - S^\circ_{298}\{\text{SbF}_5, \text{l}\} \\ &= S^\circ_{298}\{\text{LiSbF}_6, \text{s}\} - 300.6 \end{aligned} \quad (\text{S7})$$

but we have no experimental measurement currently available for  $S_{298}^{\circ}\{\text{LiSbF}_6, \text{s}\}$ . However, using VBT, we can provide an estimate of the latter, using equation (6), provided we have data for  $V_m\{\text{LiSbF}_6\}$ . This volume can be obtained by at least two routes (Figure 3). From crystal structure data,<sup>R6</sup> the hexagonal unit cell of  $\text{LiSbF}_6$  has lengths:  $a = 0.518 \text{ nm}$  and  $c = 1.360 \text{ nm}^3$  with  $Z = 3$ , hence  $V_m\{\text{LiSbF}_6\} = \sin(60^\circ) a^2 c / Z = 0.1053 \text{ nm}^3$  (using the formula in footnote (2) of ref. (R7)). Being experimentally based, this is the preferred route by which to obtain  $V_m\{\text{LiSbF}_6\}$ ; this value can be checked (assuming additivity of single ion volumes) using our database,<sup>R3</sup> whereby:  $V_m\{\text{LiSbF}_6\} \approx V\{\text{Li}^+\} + V\{\text{SbF}_6^-\} \approx 0.123 (\pm 0.012) \text{ nm}^3$ , just larger than might have been expected. Hence, using the experimental volume,  $S_{298}^{\circ}\{\text{LiSbF}_6, \text{s}\} \approx 158 \text{ J K}^{-1} \text{ mol}^{-1}$ . Substitution into eq.(S7) then leads to  $\Delta S_1 \approx -143 \text{ J K}^{-1} \text{ mol}^{-1}$  and, hence, to  $\Delta G \approx -76 \text{ kJ mol}^{-1}$ , so confirming the experimental observation that formation of  $\text{LiSbF}_6$  is thermodynamically favoured in reaction (S5) (with  $n = 1$ ). Note also that, in adopting the VBT approach and in order to maximise accuracy, *whenever possible* one should employ experimentally known data or data from thermochemical tables, resorting to VBT procedures only in the absence of information. While the difference between the two volumes in this case may be regarded as substantial, its effect is considerably mitigated in use for enthalpy calculations by the use of the cube-root of the formula unit volume.

In order to consider whether  $\text{LiSb}_2\text{F}_{11}$  is thermodynamically likely to be the product of reaction (S5) if  $n$  is doubled to 2, we can employ a cycle equivalent to that shown in Figure 2 for this specific case. This leads to the equations:

$$\begin{aligned} \Delta H_2 / \text{kJ mol}^{-1} \approx & \Delta_f H^\circ\{\text{Li}^+, \text{g}\} + \Delta_f H^\circ\{\text{Sb}_2\text{F}_{11}, \text{g}\} - \Delta_f H^\circ\{\text{LiF}, \text{s}\} \\ & - 2 \Delta_f H^\circ\{\text{SbF}_5, \text{l}\} - U_{\text{POT}}\{\text{LiSb}_2\text{F}_{11}\} - \frac{1}{2}RT \end{aligned}$$

$$\approx 440.4 (\pm 25) - U_{POT}\{\text{LiSb}_2\text{F}_{11}\} \quad (\text{S8})$$

$$\begin{aligned} \Delta S_2 / \text{J K}^{-1} \text{ mol}^{-1} &\approx S_{298}^{\circ}\{\text{LiSb}_2\text{F}_{11,\text{s}}\} - S_{298}^{\circ}\{\text{LiF},\text{s}\} - 2 S_{298}^{\circ}\{\text{SbF}_5,\text{l}\} \\ &\approx S_{298}^{\circ}\{\text{LiSb}_2\text{F}_{11,\text{s}}\} - 565.7 \end{aligned} \quad (\text{S9})$$

on substituting the known data above with  $\Delta_f H^{\circ}\{\text{Li}^+,\text{g}\} = 685.78 \text{ kJ mol}^{-1}$ , and taking  $\Delta_f H^{\circ}\{\text{Sb}_2\text{F}_{11}^-, \text{g}\} \approx -3516 (\pm 25) \text{ kJ mol}^{-1}$ , as determined from our recent *ab initio* computations.<sup>R8</sup> The two remaining unknown pieces of data are  $U_{POT}\{\text{LiSb}_2\text{F}_{11}\}$  and  $S_{298}^{\circ}\{\text{LiSb}_2\text{F}_{11,\text{s}}\}$ , both of which can be estimated via VBT, provided  $V_m\{\text{LiSb}_2\text{F}_{11}\}$  can have been estimated (bearing in mind that we have no crystal structure data for this hypothetical, as yet unsynthesized material).

However, we can use known crystal data, together with our isomegetic rule<sup>R1</sup> to estimate the volume from known crystal structure data:

$$V_m\{\text{LiSb}_2\text{F}_{11}\} \approx 2V_m\{\text{LiSbF}_6\} + V_m\{\text{LiF}\} \quad (\text{S10})$$

where  $V_m\{\text{LiF}\} / \text{nm}^3 = 0.0163$  (LiF has cubic cell constants:<sup>R6</sup>  $a = 0.40262 \text{ nm}$ ,  $Z = 4$  and, hence,  $V_m\{\text{LiF}\} = a^3/Z$ ), while we already know  $V_m\{\text{LiSbF}_6\}$  so that, from equation (S10),  $V_m\{\text{LiSb}_2\text{F}_{11}\} / \text{nm}^3 = 2(0.105) + 0.016 = 0.226$ . From equations (12) and (6) then  $U_{POT}\{\text{LiSb}_2\text{F}_{11}\} \approx 489 \text{ kJ mol}^{-1}$  and  $S_{298}^{\circ}\{\text{LiSb}_2\text{F}_{11,\text{s}}\} \approx 322 \text{ J K}^{-1} \text{ mol}^{-1}$ . From equations (S8) and (S9):  $\Delta H_2 \approx -48.6 (\pm 25) \text{ kJ mol}^{-1}$ ;  $\Delta S_2 \approx -244 \text{ J K}^{-1} \text{ mol}^{-1}$  and hence:  $\Delta G_2 \approx +24 (\pm 25) \text{ kJ mol}^{-1}$ . We therefore conclude that preparation of  $\text{LiSb}_2\text{F}_{11}$  is *very probably* thermodynamically unfavourable by route (S5) ( $n = 2$ ), as is (currently) consistent with experimental fact.

**Use of VBT to probe quantitative thermodynamics of reactions involving gas / liquid phase ions**

**Fluoride Ion affinity estimation** The fluoride ion affinity,  $FIA\{\text{SbF}_5, \text{l}\}$ , of liquid  $\text{SbF}_5$  is represented by the enthalpy change of the reaction:

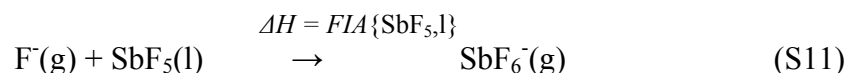

VBT can be used to obtain an estimate of this quantity (and of  $\Delta H$  for similar reactions involving gas phase ions). Firstly we note that adding a gaseous metal cation,  $M^+(\text{g})$  to *both sides* of the reaction *does not change* the overall thermodynamic enthalpy change,  $\Delta H$ , of the reaction, thus:

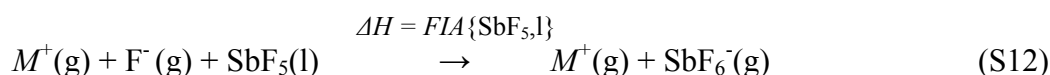

This addition then facilitates: (i) the construction of a thermochemical cycle based

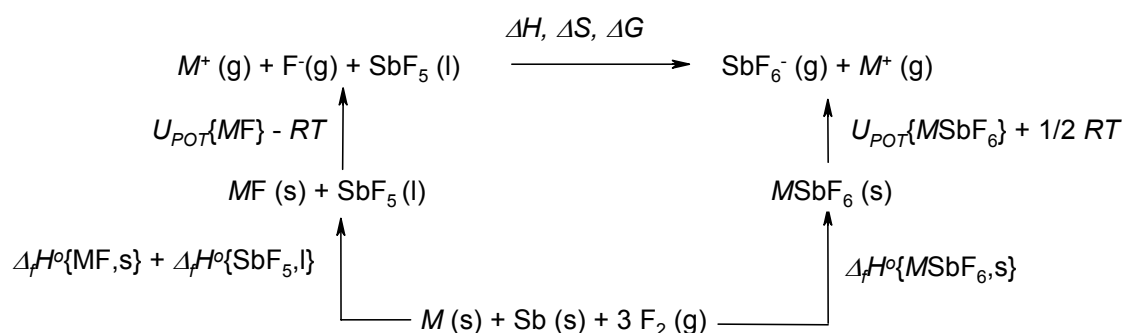

on the target reaction and (ii) the introduction of a (quantifiable) lattice potential energy (enthalpy)<sup>R9</sup> step - which can be evaluated from tabulated data (in the case of  $\text{MF}$ ) or else can be estimated from VBT theory (in the case of  $\text{MSbF}_6$ ). Provided then that the standard enthalpies of formation of the artificially introduced salts,  $\Delta_f H^\circ\{\text{MF}, \text{s}\}$  and  $\Delta_f H^\circ\{\text{MSbF}_6, \text{s}\}$  are known then these can be combined with  $\Delta_f H^\circ\{\text{SbF}_5, \text{l}\} = -1\,328 \text{ kJ mol}^{-1}$  to obtain an estimate of  $\Delta H (= FIA\{\text{SbF}_5, \text{l}\})$ . The process can be repeated for differing metal ions,  $M^+$ , provided data is available, and then an average can be taken. We illustrate the calculation for  $M^+ = \text{K}^+$ . From the cycle:

$$\begin{aligned} \Delta H (= FIA\{\text{SbF}_5, \text{l}\}) = U_{POT}\{\text{MSbF}_6\} - U_{POT}\{\text{MF}\} + 3/2 RT + \Delta_f H^\circ\{\text{MSbF}_6, \text{s}\} \\ - \Delta_f H^\circ\{\text{MF}, \text{s}\} - \Delta_f H^\circ\{\text{SbF}_5, \text{l}\} \end{aligned} \quad (\text{S13})$$

for the potassium salts involved:  $U_{POT}\{\text{KF}\} / \text{kJ mol}^{-1} = 808$ ; <sup>R10</sup>  $\Delta_f H^\circ\{\text{KSbF}_6, \text{s}\} / \text{kJ mol}^{-1} = -2092$ ; <sup>R11</sup>  $-2086$ ; <sup>R5</sup> averaging to  $-2089 (\pm 3)$ ;  $\Delta_f H^\circ\{\text{KF}, \text{s}\} / \text{kJ mol}^{-1} = -567.3$  and hence:

$$\Delta H (= FIA\{\text{SbF}_5, \text{g}\}) / \text{kJ mol}^{-1} = U_{POT}\{\text{MSbF}_6\} - 997.95 (\pm 3) \quad (\text{S14})$$

There are two crystal structure determinations for  $\text{KSbF}_6$ : the first<sup>R12</sup> reports a cubic arrangement with  $a = 1.014 \text{ nm}$ ,  $Z = 8$  and thus  $V_m\{\text{KSbF}_6\} / \text{nm}^3 = a^3/8 = 0.1303$  leading to a lattice energy (1:1 values of  $\alpha$  and  $\beta$ ,  $I = 1$ ),  $U_{POT}\{\text{KSbF}_6\} / \text{kJ mol}^{-1} = 567$  and the second<sup>R13</sup> reports a tetragonal arrangement with:  $a = 0.516 \text{ nm}$ ,  $c = 1.007$ ;  $Z = 2$  so that  $V_m\{\text{KSbF}_6\} / \text{nm}^3 = a^2c/2 = 0.1341$ . The two crystal structure volumes average to give:  $V_m\{\text{KSbF}_6\} / \text{nm}^3 = 0.1322 (\pm 0.019)$  leading to a lattice energy (1:1 values of  $\alpha$  and  $\beta$ ,  $I = 1$ ),  $U_{POT}\{\text{KSbF}_6\} / \text{kJ mol}^{-1} = 564$ .  $\Delta H (= FIA\{\text{SbF}_5, \text{l}\}) / \text{kJ mol}^{-1}$  (from eq.(S14))  $\approx -436$  (equivalent to a  $\text{pF}^-$  value [defined by the relationship:  $\text{pF}^-(\text{SbF}_5, \text{l}) = (-FIA(\text{SbF}_5, \text{l}) / \text{kcal mol}^{-1}) / 10] = 10.4$ ). This value is within the error limits, although is somewhat higher than the value  $FIA\{\text{SbF}_5, \text{l}\} / \text{kJ mol}^{-1} \approx -475 (\pm 63)$  (equivalent to a  $\text{pF}^-$  value = 11.4) which is obtained from a consideration of a larger number of salts<sup>R14</sup> (i.e., varying  $\text{M}^+$ ) in an identical fashion.

A similar calculation could also be performed for  $\text{SbF}_5$  in the gaseous state to give an estimate for  $FIA\{\text{SbF}_5, \text{g}\}$ .

### Use of VBT to probe the thermodynamics of complex solid / gas reactions

**The NO/NO<sub>2</sub> – LiAl(OR)<sub>4</sub> reaction** In the next example we use the VBT procedure to investigate two alternative preparative routes for the salt  $\text{NO}[\text{Al}(\text{OC}(\text{CF}_3)_2\text{Ph})_4]$  using the solid-state reaction of  $\text{Li}[\text{Al}(\text{OC}(\text{CF}_3)_2\text{Ph})_4]$  either with nitrogen oxides, NO



and NO<sub>2</sub> (i.e., by reaction (S15)) or exclusively with NO alone (i.e., by reaction (S16)). Suppose we wish to decide which of the two following reactions is the more thermodynamically favourable:

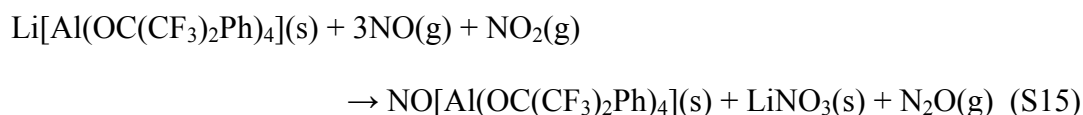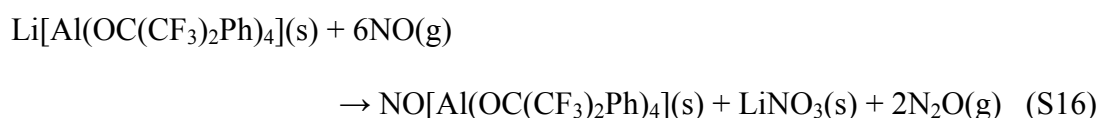

A suitable cycle by which to probe reaction (S15) is shown below:

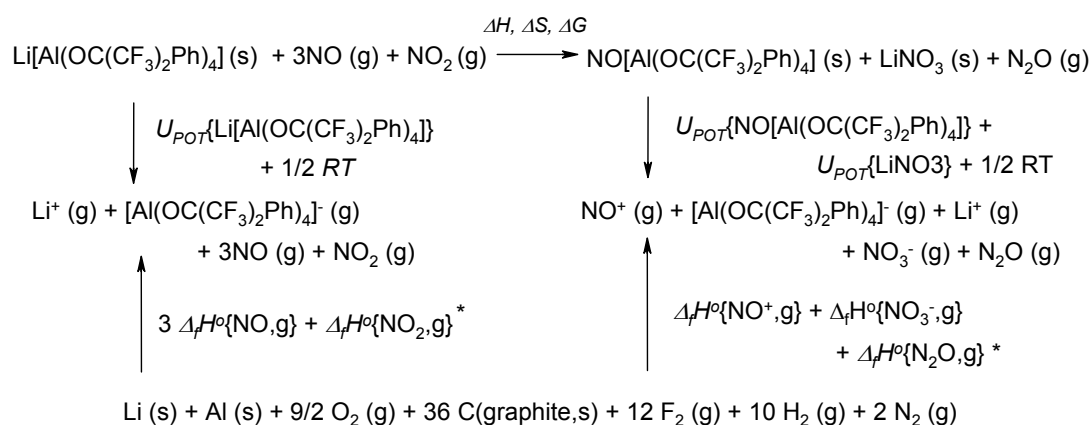

\* Enthalpies of formation which cancel out are omitted

for which:

$$\begin{aligned} \Delta H = & U_{POT}\{\text{Li[Al(OC(CF}_3)_2\text{Ph)}_4\text{]}\} - U_{POT}\{\text{NO[Al(OC(CF}_3)_2\text{Ph)}_4\text{]}\} - U_{POT}\{\text{LiNO}_3\} \\ & - 3 \Delta_f H^\circ\{\text{NO}, \text{g}\} - \Delta_f H^\circ\{\text{NO}_2, \text{g}\} + \Delta_f H^\circ\{\text{NO}^+, \text{g}\} \\ & + \Delta_f H^\circ\{\text{NO}_3^-, \text{g}\} + \Delta_f H^\circ\{\text{N}_2\text{O}, \text{g}\} \quad (\text{S17}) \end{aligned}$$

$$\begin{aligned} \Delta S = & S_{298}^\circ\{\text{NO[Al(OC(CF}_3)_2\text{Ph)}_4\text{], s}\} - S_{298}^\circ\{\text{Li[Al(OC(CF}_3)_2\text{Ph)}_4\text{], s}\} \\ & + S_{298}^\circ\{\text{LiNO}_3, \text{s}\} + S_{298}^\circ\{\text{N}_2\text{O}, \text{g}\} - 3 S_{298}^\circ\{\text{NO}, \text{g}\} - S_{298}^\circ\{\text{NO}_2, \text{g}\} \quad (\text{S18}) \end{aligned}$$

Substitution of known thermodynamic data into equations (S17) and (S18) leads to the following:

$$\Delta H / \text{kJ mol}^{-1}$$

$$\begin{aligned}
 &= U_{POT}\{\text{Li}[\text{Al}(\text{OC}(\text{CF}_3)_2\text{Ph})_4]\} - U_{POT}\{\text{NO}[\text{Al}(\text{OC}(\text{CF}_3)_2\text{Ph})_4]\} - U_{POT}\{\text{LiNO}_3\} \\
 &\quad - 3 \{90.29\} - \{33.10\} + \{990.3\} + \{-306 (\pm 1.3)\} + \{82.05\} \\
 &= U_{POT}\{\text{Li}[\text{Al}(\text{OC}(\text{CF}_3)_2\text{Ph})_4]\} - U_{POT}\{\text{NO}[\text{Al}(\text{OC}(\text{CF}_3)_2\text{Ph})_4]\} \\
 &\quad - U_{POT}\{\text{LiNO}_3\} + 462.4 (\pm 1.3) \quad (\text{S19})
 \end{aligned}$$

and

$$\begin{aligned}
 \Delta S / \text{J K}^{-1} \text{ mol}^{-1} &= S_{298}^0\{\text{NO}[\text{Al}(\text{OC}(\text{CF}_3)_2\text{Ph})_4, \text{s}]\} - S_{298}^0\{\text{Li}[\text{Al}(\text{OC}(\text{CF}_3)_2\text{Ph})_4, \text{s}]\} \\
 &\quad + \{90.9\} + \{219.96\} - 3 \{210.76\} - \{240.40\} \\
 &= S_{298}^0\{\text{NO}[\text{Al}(\text{OC}(\text{CF}_3)_2\text{Ph})_4, \text{s}]\} - S_{298}^0\{\text{Li}[\text{Al}(\text{OC}(\text{CF}_3)_2\text{Ph})_4, \text{s}]\} \\
 &\quad - 561.8 \quad (\text{S20})
 \end{aligned}$$

To apply VBT we now need  $V_m\{\text{NO}[\text{Al}(\text{OC}(\text{CF}_3)_2\text{Ph})_4]\}$  and

$V_m\{\text{Li}[\text{Al}(\text{OC}(\text{CF}_3)_2\text{Ph})_4]\}$ . Since we have the latter material as a starting compound, we could perform a crystal structure determination to provide its formula unit volume.

Instead we resort to employing Hofmann's elemental volumes,<sup>R4</sup> whereupon:

$$\begin{aligned}
 &V_m\{\text{NO}[\text{Al}(\text{OC}(\text{CF}_3)_2\text{Ph})_4]\} / \text{nm}^3 \\
 &\quad \approx [11.8 (\pm 1.3) + 5 \{11.39 (\pm 0.17)\} + 39.6 (\pm 1.3) + 36 \{13.87 (\pm 0.05)\} \\
 &\quad \quad + 24 \{11.17 (\pm 0.15)\} + 20 \{5.08 (\pm 0.04)\}] / 1000 \\
 &\quad \approx 0.977 (\pm 0.004) \quad (\text{S21})
 \end{aligned}$$

and  $V_m\{\text{Li}[\text{Al}(\text{OC}(\text{CF}_3)_2\text{Ph})_4]\}$  can then be found by the (exchange) relationship:

$$\begin{aligned}
 &V_m\{\text{Li}[\text{Al}(\text{OC}(\text{CF}_3)_2\text{Ph})_4]\} / \text{nm}^3 \\
 &\quad \approx V_m\{\text{NO}[\text{Al}(\text{OC}(\text{CF}_3)_2\text{Ph})_4]\} - V\{\text{NO}^+\} + V\{\text{Li}^+\} \\
 &\quad \approx [977 (\pm 4) - \{11.8 (\pm 1.3) + 11.39 (\pm 0.17)\} + 22.6 (\pm 0.9)] / 1000 \\
 &\quad \approx 0.976 (\pm 0.019) \quad (\text{S22})
 \end{aligned}$$

Employing the values<sup>R14</sup>:  $V\{\text{NO}^+\} / \text{nm}^3 = 0.010 (\pm 0.010)$  and  $V\{\text{Li}^+\} / \text{nm}^3 = 0.002$ :

$$\begin{aligned}
 &V_m\{\text{Li}[\text{Al}(\text{OC}(\text{CF}_3)_2\text{Ph})_4]\} / \text{nm}^3 \\
 &\quad \approx [0.977 (\pm 0.004) - 0.010 (\pm 0.010) + 0.002]
 \end{aligned}$$

$$\approx 0.969 (\pm 0.010) \quad (\text{S23})$$

leading to:  $U_{POT}\{\text{NO}[\text{Al}(\text{OC}(\text{CF}_3)_2\text{Ph})_4]\} / \text{kJ mol}^{-1} \approx 340$  and  $U_{POT}\{\text{Li}[\text{Al}(\text{OC}(\text{CF}_3)_2\text{Ph})_4]\} / \text{kJ mol}^{-1} \approx 341$  (note the similarity of lattice energies for the nitroso and the lithium salts - arising because the anion  $[\text{Al}(\text{OC}(\text{CF}_3)_2\text{Ph})_4]^-$  is so very large when compared to the cations).

It is worthwhile noting that once the product,  $\text{NO}[\text{Al}(\text{OC}(\text{CF}_3)_2\text{Ph})_4]$ , was acquired,<sup>R15</sup> a crystal structure determination showed its volume to be  $0.9825 \text{ nm}^3$ , this value is within  $0.006 \text{ nm}^3$  of our estimated value.

$U_{POT}\{\text{LiNO}_3\}$  can be obtained from crystal structure data (hexagonal:  $a = 0.4693 \text{ nm}$ ,  $c = 1.5224 \text{ nm}$ ,  $Z = 6$  so that  $V_m\{\text{LiNO}_3\} = a^2c \sin 60^\circ / Z = 0.048 \text{ nm}^3$  leading (by eq.12) to  $U_{POT}\{\text{LiNO}_3\} / \text{kJ mol}^{-1} = 749$ ) or from experimental density (eq.7),  $\rho / \text{g cm}^{-3} = 2.366$  and  $M = 68.946 \text{ g mol}^{-1}$ , leading, similarly, to  $V_m\{\text{LiNO}_3\} = 0.048 \text{ nm}^3$ . A study of the nitrate lattice energies based on viscosity data<sup>R16</sup> gave rise to the value:  $U_{POT}\{\text{LiNO}_3\} / \text{kJ mol}^{-1} = 848$ . The estimated value of  $U_{POT}\{\text{LiNO}_3\}$  (eq. 12) is  $748 \text{ kJ mol}^{-1}$ , using the preferred experimentally-derived volume.

The difference in entropy:

$$[S_{298}^0\{\text{NO}[\text{Al}(\text{OC}(\text{CF}_3)_2\text{Ph})_4],s\} - S_{298}^0\{\text{Li}[\text{Al}(\text{OC}(\text{CF}_3)_2\text{Ph})_4],s\}]$$

can be approximated, simply, by  $[k (V\{\text{NO}^+\} - V\{\text{Li}^+\})]$  adopting the assumption of ion additivity in conjunction with equation (6), so that, since  $k = 1360 \text{ J K}^{-1} \text{ mol}^{-1} \text{ nm}^{-3}$  and taking ion volumes from our database:<sup>R14</sup>  $V\{\text{NO}^+\} / \text{nm}^3 = 0.010 (\pm 0.010)$  and  $V\{\text{Li}^+\} / \text{nm}^3 = 0.002$  so that the difference in entropy is  $10.9 (\pm 13.6) \text{ J K}^{-1} \text{ mol}^{-1}$ .

Using the above estimates from VBT leads to the values:  $\Delta H \approx -286 \text{ kJ mol}^{-1}$  (eq. S19) and  $\Delta S \approx -550.9 (\pm 13.6) \text{ J K}^{-1} \text{ mol}^{-1}$  (eq. S20), so that (at 298K)  $\Delta G$  for reaction (S15) is estimated to be  $-122 (\pm 14) \text{ kJ mol}^{-1}$ .

Consideration of the second reaction (S16) will lead to the following equations:

$$\Delta H = U_{POT}\{\text{Li}[\text{Al}(\text{OC}(\text{CF}_3)_2\text{Ph})_4]\} - U_{POT}\{\text{NO}[\text{Al}(\text{OC}(\text{CF}_3)_2\text{Ph})_4]\} - U_{POT}\{\text{LiNO}_3\} \\ - 6 \Delta_f H^\circ\{\text{NO}, \text{g}\} + \Delta_f H^\circ\{\text{NO}^+, \text{g}\} + \Delta_f H^\circ\{\text{NO}_3^-, \text{g}\} + 2 \Delta_f H^\circ\{\text{N}_2\text{O}, \text{g}\} \quad (\text{S23})$$

$$\Delta S = S^\circ_{298}\{\text{NO}[\text{Al}(\text{OC}(\text{CF}_3)_2\text{Ph})_4], \text{s}\} - S^\circ_{298}\{\text{Li}[\text{Al}(\text{OC}(\text{CF}_3)_2\text{Ph})_4], \text{s}\} \\ + S^\circ_{298}\{\text{LiNO}_3, \text{s}\} + 2 S^\circ_{298}\{\text{N}_2\text{O}, \text{g}\} - 6 S^\circ_{298}\{\text{NO}, \text{g}\} \quad (\text{S24})$$

and using identical data to that discussed above, to  $\Delta H \approx -440 \text{ kJ mol}^{-1}$ ;  $\Delta S \approx -722.8 (\pm 13.6) \text{ J K}^{-1} \text{ mol}^{-1}$ , so that (at 298K),  $\Delta G$  for reaction (S16) is estimated to be  $-225 (\pm 14) \text{ kJ mol}^{-1}$ .

The following conclusions can be made. Both reactions (S15) and (S16) are thermodynamically favourable - the latter more than the former by some  $100 \text{ kJ mol}^{-1}$  and both are enthalpically driven. The formation of the  $\text{LiNO}_3$  structure, in the course of these reactions, features as an important enthalpic driving force, whilst the disruption and formation of the  $\text{Li}[\text{Al}(\text{OC}(\text{CF}_3)_2\text{Ph})_4]$  and  $\text{NO}[\text{Al}(\text{OC}(\text{CF}_3)_2\text{Ph})_4]$  respectively, which takes place during both reactions, hardly influences the overall energetics.

### **Caveat**

In attempting to apply these methods, it should always be remembered that VBT offers us only a *rough guide* to the underlying thermodynamics but, in cases where data is unknown, as in the above example, it serves to provide a *quantitative* estimate of the likely situation (but does ignore kinetic factors).

## References

- R1** H. D. B. Jenkins, L. Glasser, T. M. Klapötke, M.-J. Crawford, K. K. Bhasin, J. Lee, G. J. Schrobilgen, L. S. Sunderlin and J. F. Liebman, *Inorg. Chem.*, 2004, **43**, 6238-6248.
- R2** D. D. Wagman, W. H. Evans, V. B. Parker, R. H. Schumm, R. L. Nutall, *Selected Values of Chemical Thermodynamic Properties*, U. S. Dept. Commerce, National Bureau of Standards: Washington, D.C., 1982. M. W. Chase, Jr., et al., *NIST-JANAF Thermochemical Tables*, *J. Phys. Chem. Ref. Data*, Monograph #9, 1998. NIST database:  
<http://www.webbook.nist.gov/chemistry/>
- R3** H. D. B. Jenkins, H. K. Roobottom, J. Passmore and L. Glasser, *Inorg. Chem.*, 1999, **38**, 3609-3620.
- R4** D. W. M. Hofmann, *Acta Cryst.*, 2002, **B57**, 489-493.
- R5** J. Burgess, R. D. Peacock and R. J. Sherry, *J. Fluorine Chem.*, 1982, **20**, 541 – 552.
- R6** J. D. H. Donnay and H. M. Ondik, *Crystal Data: Determinative Tables*, 2 vols., 3rd Ed., National Bureau of Standards, Washington, D. C., 1973. *Crystallographic and Crystallochemical Database for Mineral and their Structural Analogues*: <http://database.iem.ac.ru/mincryst/>.
- R7** H. D. B. Jenkins, D. Tudela and L. Glasser, *Inorg. Chem.*, 2002, **41**, 2364-2367.
- R8** I. Krossing, J. Passmore and H. D. B. Jenkins, *J. Fluorine Chem.*, 2004, **125**, 1585–1592.
- R9** H. D. B. Jenkins, *J. Chem. Educ.*, 2005, **82**, 950-952.
- R10** H. D. B. Jenkins and K. F. Pratt, *Proc. Roy. Soc. (London)*, 1977, **A356**, 115.

- R11** C. W. Richards and A. A. Woolf, *J. Fluorine Chem.*, 1971, **1**, 129-139.
- R12** Landolt-Börnstein Tabellen, New series: Hellwege, K.-H., Ed.: Group III: Crystal and Solid State Physics, Vol. 7, *Crystal Structure data and Inorganic Compounds*, Springer-Verlag: Berlin, 1973.
- R13** G. J. Kruger, C. W. F. T. Pistorius and A. M. Heyns, *Acta Cryst.*, 1976, **B32**, 2916-2918.
- R14** H. D. B. Jenkins, H. K. Roobottom and J. Passmore, *Inorg. Chem.*, 2003, **42**, 2886-2893.
- R15** A. Decken, H. D. B. Jenkins, G. B. Nikiforov and J. Passmore, *J. Chem. Soc., Dalton Trans.*, 2004, 2496-2504.
- R16** H.D. B. Jenkins; D. F. C. Morris, *Phil. Mag.*, 1977, **35**, 1091.
