# Supplementary material for: Predictive thermodynamics for condensed phases
Source: Royal Society of Chemistry journal article supplement (doi:10.1039/b501741f), 2005-01-01
Supplement: b501741f-sources.pdf [file b501741f-sources.pdf]

## **Predictive Thermodynamics for Condensed Phases**

*Leslie Glasser\**

Nanochemistry Research Institute, Dept. of Applied Chemistry, Curtin University of  
Technology, GPO Box U1987, Perth WA, 6845, Australia

Telephone: +61 8 6293-1202      Fax: +61 8 9266-4699

E-mail: [l.glasser@exchange.curtin.edu.au](mailto:l.glasser@exchange.curtin.edu.au)

and

*H. Donald Brooke Jenkins\**

Department of Chemistry, University of Warwick, Coventry CV4 7AL, West  
Midlands, United Kingdom

Telephone: +44 2476 523-265; +44 2476 466747      Fax: +44 2476 466-747

E-mail: [Don.Jenkins@warwick.ac.uk](mailto:Don.Jenkins@warwick.ac.uk)

\*Corresponding authors

## Supplementary Information

### **Current Sources of Thermodynamic Data: 2005**

see:

Nuclear Science Committee, "Survey of Thermodynamic and Kinetic Databases",

OECD Nuclear Energy Agency, NEA/NSC/DOC(96)27, Sept., 1996.

<http://www.nea.fr/html/science/chemistry/tdbsurvey.html>

Westrum, Jr., E. F. "Newest Thermodynamic and Thermophysical Databases of the 1997 Era", CODATA Conference, Korea, 1997.

<http://codata/kisti/re/kr/proceeding/7-2.html>

(1) Lide D. R., Ed., *Handbook of Chemistry and Physics*, 85<sup>th</sup> ed., CRC Press: Boca Raton, 2004-2005. *Handbook of Chemistry and Physics on CD-ROM*, Version 2005.; Lide, D. R., Ed.; CRC Press: New York, 2005.

(2) Wagman, D. D.; Evans, W. H.; Parker, V. B.; Schumm, R. H.; Nutall, R. L. *Selected Values of Chemical Thermodynamic Properties*, U. S. Dept. Commerce, National Bureau of Standards: Washington, D.C., 1982; also, Wagman, D. D.; Evans, W. H.; Parker, V. B.; Schumm, R. H.; Halow, I.; Bailey, S. M.; Churney, K. L.; Nutall, R. L. *The NBS Tables of Chemical Thermodynamic Properties, J. Phys. Chem. Ref. Data*, 1982, 11, Suppl. 2. (New edition of NBS technical note no. 270 *Selected values of chemical thermodynamic properties*.) Chase, Jr., M. W. *NIST-JANAF Thermochemical Tables*, 2 Vols., 4<sup>th</sup> ed., ca. 1998; *J. Phys. Chem. Ref. Data*, Monograph No. 9.

(3) NIST database, <http://www.webbook.nist.gov/chemistry/>

- (4) Robie, R. A.; Hemingway, B. S.; Fisher, J. R. *Thermodynamic Properties of Minerals and Related Substances at 298.15 K and 1 Bar ( $10^5$  Pascals) Pressure and at Higher Temperatures*, Geological Survey Bulletin 1452, U. S. Government Printing Office: Washington, D.C., 1978.
- (5) Saxena, S. K.; Chatterjee, N.; Fei, Y.; Shen, G. *Thermodynamic Data on Oxides and Silicates*, Springer: Berlin, 1993.
- (6) *HSC Chemistry for Windows*, Outokumpu Research Oy, Pori, Finland, version 5, 2002.
- (7) Barin, I. *Thermochemical Data of Pure Substances*, 3rd ed., 2 vols., VCH Publishing: Weinheim, 1995.
- (8) Stull, D. R.; Westrum, Jr., E. F.; Sinke, G. C. *The Chemical Thermodynamics of Organic Compounds*, Wiley, New York, 1969.
- (9) Landolt-Börnstein Tables, *Thermodynamic Properties of Organic Compounds and their Mixtures*, New Series, Group IV/8, Springer: New York, from 1995.
- (10) Landolt-Börnstein Tables, *Thermodynamic Properties of Inorganic Materials*, New Series, Group IV/19, Springer: New York, from 1999.
- (11) Karapet'yants, M. Kh.; Karapet'yants, M. L. *Thermodynamic Constants of Inorganic and Organic Compounds*, Schmorak, J., transl., Ann Arbor – Humphrey Science Publishers, Ann Arbor, London, 1970.
- (12) Kelly, K. K.; King, E. G. *Contribution to the Data on Theoretical Metallurgy. XIV. Entropies of the Elements and Inorganic Compounds*, Bur. Mines. Bull., 592, Washington, 1959.

- (13) Pankratz, L.B.; Stuve, J. M.; Gokcen, N. a. *Thermodynamic Data for Mineral Technology*, U. S. Bur. Mines, Bulletin 677, Supt. of Docs., Washington, DC, 1984 (incorporates and supplements Bulletins 672 and 674).
- (14) King, E. G.; Weller, W. W., *U. S. Bur. Mines Rept. of Investig.* 5590, Dept. Interior, Washington, 1960.
- (15) Cox, J. D.; Pilcher G. *Thermochemistry of Organic and Organometallic Compounds*, Academic Press: London, 1970.
- (16) Cox, J. D.; Wagman, D. D.; Medvedev, V. A. *CODATA Key Values for Thermodynamics*, Hemisphere Pbl. Corp.: New York, 1989.
- (17) Frenkel, M., NIST Standard Reference Database 85, electronic database, Thermodynamics Research Center, Boulder, CO, 2001.
- (18) Daubert, T. E.; Danner, R. P.; Sibul, H. M.; Stebbins, C. C. *Physical and Thermodynamic Properties of Pure Compounds: Data Compilation*, extant 1994 (core with 4 supplements), Taylor & Francis: Bristol, PA.
- (19) Pedley, J. B.; Naylor, R. D.; Kirby S. P. *Thermochemical Data of Organic Compounds*, 2<sup>nd</sup> ed., Chapman & Hall: London, 1986.
- (20) Pedley, J. B. *Thermochemical Data and Structures of Organic Compounds*, Thermodynamic Research Center, Texas A & M Univ., College Station, TX, 1994.
- (21) Dolmaski, E. S.; Evans, W. H.; Hearing, E. D. *Heat Capacities and Entropies of Organic Compounds in the Condensed Phase*, *J. Phys. Chem. Ref. Data*, 13, suppl. 1, 1984; 19(4), 881-1047, 1990.

- (22) Gurvich, L. V.; Veyts, I. V.; Alcock, C. B.; Iorish, V. S. *Thermodynamic Properties of Individual Substances*, 4<sup>th</sup> ed. in 5 vols., Hemisphere Publ. Corp.: New York, 1991; CRC Press: Boca Raton, FL, 1994.
- (23) Yungman, V. S.; Glushko, V. P.; Medvedev, V. A.; Gurvich, L. V., eds., *Thermal Constants of Substances*, 8 vols., Wiley: New York, 1999.
- (24) Lide, D. R.; Kehiaian, H. V. *CRC Handbook of Thermophysical and Thermochemical Data*, CRC Press: Boca Raton, FL, 1994.
- (25) Knacke, O.; Kubaschewski, O.; Hesselmann, K., eds., *Thermochemical Properties of Inorganic Substances*, 2<sup>nd</sup> ed., Springer: Berlin, 1971.
- (26) Samsonov, G. V., ed., *The Oxide Handbook*, Plenum: New York, 1982.
- (27) Janz, G. J. *Thermodynamic Properties of Organic Compounds*, Revised Ed., Academic Press: New York, 1967.
- (28) Benson, S. W. *Thermochemical Kinetics*, 2<sup>nd</sup> ed., Wiley: New York, 1976.
- (29) Wilhoit, R. C.; Zwolinski, B. J. "Physical and Thermodynamic Properties of Aliphatic Alcohols", *J. Phys. Chem. Ref. Data*, 2, suppl. 1, 1973.
- (30) IUPAC Subcommittee for Gas Kinetic Data Evaluation: table of enthalpies of formation: <http://www.iupac-kinetic.ch.cam.ac.uk/Thermo2002.pdf>
- (31) Blanksby, S. J.; Ellison, G. B. "Bond Dissociation Energies of Organic Molecules", *Acc. Chem. Res.*, **2003**, 36, 225-263.
- (32) B. E. Poling, J. M. Prausnitz and J. P. O'Connell, *The Properties of Gases and Liquids*, 5<sup>th</sup> ed., McGraw-Hill: 2001.

**Physical and Chemical Data Sources for Thermodynamic and  
Thermochemical Properties**

***Journal of Physical and Chemical Reference Data.***

This journal, published jointly by the National Institute of Standards and Technology and the American Institute of Physics, contains contributions from the National Standard Reference Data System (NSRDS). It is used to provide critically evaluated physical and chemical property data, fully documented as to the original sources and the criteria used for evaluation. Cumulative indexes are included periodically in the journals and University of Chicago authorized users have searchable access to contents and abstracts (1975-present) and full-text articles (2000-present) on the web. Articles too lengthy for regular issue publication are produced as *Monographs* and *Supplements*.

<http://ojps.aip.org/jpcrd/>

-----

***Thermochemical Data of Pure Substances.*** Ihsan Barin. 3rd edition. 2 volumes  
VCH: New York, 1995.

Covering about 230 organic substances in 2518 tables, functions include temperature dependent properties, heat capacity, entropy, Gibbs energy function, enthalpy, etc. Includes references and background information.

-----

***Thermodynamics of Organic Compounds in the Gas State.*** M. L. Frenkel. 2 volumes  
+ computer disk Thermodynamics Research Center: College Station, 1994.

Numerical data on heat capacity, entropy, enthalpy, Gibbs free energy for elements, inorganic compounds and C1 to C36 organics and organic radicals. Formula, name and CAS registry number indexes available.

-----

***Thermodynamic Properties of Individual Substances.*** L. V. Gurvich, I. V. Veyts and C. B. Alcock. 4th edition. 5 volumes (each in 2 pts) Hemisphere Publishing Co.: New York, 1989.

First published in 1956, under a slightly different title and under the auspices of the USSR National Standard Reference Data Service. Covers about 1100 condensed phase and gaseous substances comprised of 50 elements. Introduction contains a very good comparison of various data compilation handbooks. Each volume includes a textual and a tabular part and reports quantities like heat capacity, Gibbs energy, enthalpy, entropy, equilibrium constants for atomization of gases, sublimation or vapor equilibrium constants for condensed phases, and more. Values are reported up to a maximum of 20,000 degree Kelvin.

-----

***NIST-JANAF Thermochemical Tables.*** Jr. M.W. Chase. 4th edition. 2 volumes  
*Journal of Physical and Chemical Reference Data, Monograph 9 (1998)* American  
Chemical Society, American Institute of Physics: Washington, DC, 1998.

Recommended temperature-dependent values are provided for chemical thermodynamic properties of inorganic substances and for organic substances containing only one or two carbon atoms. These tables cover the thermodynamic properties over a wide temperature range with single-phase and multiphase tables for the crystal, liquid, and ideal gas state. The properties tabulated are heat capacity, enthalpy, entropy, Gibbs energy function, enthalpy of formation, Gibbs energy of formation, and the logarithm of the equilibrium constant for formation of each compound from the elements in their standard reference states. All values are given in SI units and are for a standard-state pressure of 100 000 Pa (1 bar). Each tabulation is accompanied by a critical evaluation of the literature upon which the thermochemical table is based. Literature references are given. This volume is an update to the Third Edition which was published in *J. Phys. Chem. Ref. Data*, Volume 14 Supplement 1 (1985). It contains new and revised tabulations, In addition, it contains numerous corrections to errors (both typographical and numerical) which resulted from the massive changes made for the Third Edition.

NIST-JANAF Thermochemical Tables, Fourth Edition, Monograph No. 9 (Part I and Part II) is available from the American Institute of Physics, Suite 1NO1, 2 Huntington Quadrangle, Melville, NY 11747-4502.

-----  
*NIST Standard Reference Database 85*

## **NIST/TRC Table Database**

This database, known as WinTable, is designed to retrieve and display recommended property values of pure compounds and is essentially the electronic version of the TRC Tables-Hydrocarbons and the TRC Tables-Non-Hydrocarbons which have been compiled by the Thermodynamics Research Center (TRC) for more than 50 years. At present, WinTable includes more than 497,000 property data points and 4,450 sets of equation coefficients for 7,468 compounds and 33 properties.

WinTable contains the best available values of physical and thermodynamic properties of chemical compounds from the TRC Thermodynamic Tables - Hydrocarbons (critically evaluated data on the physical and thermodynamic properties of hydrocarbons and related sulfur derivatives of hydrocarbons present in petroleum and coal related substances)

WinTable contains the best available values of physical and thermodynamic properties of chemical compounds from the TRC Thermodynamic Tables - Non-hydrocarbons (critically evaluated data on the physical and thermodynamic properties of simple inorganic substances and organic compounds containing heteroatoms).

WinTable performs property calculations for some thermophysical properties based upon coefficients of equations.

WinTable provides Antoine Equation coefficients for vapor pressure data and fitting equation coefficients for second virial coefficients of gases.

Supplementary material (ESI) for Chemical Society Reviews  
This journal is © 2005 The Royal Society of Chemistry

You may **browse** the [Users' Guide](#) to see how this database works.

**System Requirements:** PC with Microsoft® Windows® 95, 98, NT, 2000; hard disk with 110MB of available space.

**Subscription price:** \$1,890.00

85. NIST/TRC Table Database

**For more information please contact:**

Standard Reference Data Program  
National Institute of Standards and Technology  
100 Bureau Dr. Stop 2310  
Gaithersburg, MD 20899-2310  
(301) 975-2008 (VOICE) (301) 926-0416 (FAX) [Contact Us](#)

**The scientific contact for the database is:**

Dr. Michael Frenkel, Director  
Thermodynamics Research Center (TRC)  
NIST Physical and Chemical Properties Division (838)  
325 Broadway Mailcode 838.00  
Boulder, CO 80303-3328  
[frenkel@boulder.nist.gov](mailto:frenkel@boulder.nist.gov)  
(303) 497-3952 Phone

Web Address to TRC <http://www/trc.nist.gov>

**Key words:** thermodynamics, thermophysics, recommended data, critically evaluated data, thermophysical properties, TRC, Thermodynamics Research Center

---

***Thermophysical Properties of Matter.*** Purdue University. Thermophysical Properties Research Center. 14 volumes IFI/Plenum: New York, 1970-1979.

Properties covered include thermal conductivity, specific heat, thermal radiative processes, thermal diffusivity, viscosity, and thermal expansion. Includes a master index.

---

***TRC Thermodynamics Tables. Hydrocarbons.*** Thermodynamics Research Center. Multi-volume Texas A&M University: College Station, Produced by the Texas A&M University based Thermodynamics Research Center, this looseleaf collection is current

---

***National Standard Reference Data Series (NSRDS-NBS).*** United States. National Bureau of Standards. 69 volumes Government Printing Office: Washington, DC, Formerly a companion publication to the *Journal of Physical and Chemical Reference Data*. This series generally included compilations that were very large, part of a



continuing series or based on a system, rather than a single property.

-----

***NBS Tables of Chemical Thermodynamic Properties, Selected Values of Inorganic and C1 and C2 Organic Substances in SI Units.*** Donald Wagman. American Chemical Society and American Institute of Physics: New York, 1982.

Provides enthalpies, free energies of formation, entropies and heat capacities for elements, inorganic compounds and organic compounds with one or two carbon atoms. Published as a supplement no. 2 to volume 11 of *Journal of Physical and Chemical Reference Data*.

-----

***Thermal Constants of Substances.*** Edited by V. P. Glushko, V. A. Medvedev, L. V. Gurvich and V. S. Yungman, Wiley: New York, 1999. Hard cover, 8 vols., 6592 pp., USD3700. **ISBN:** 0471318558

**Publisher's Note:**

Originally compiled in Moscow between 1965 and 1982, this renowned eight-volume set presents a comprehensive set of critically selected thermal constants of inorganic, simple organic, and metallo-organic substances. Featuring 25,976 substances and more than 51,500 references, the books cover a range of constants, including enthalpy and Gibbs energy formation, dissociation energy, enthalpy content, entropy and heat capacity at standard temperature, crystallographic and critical parameters, ionization potential, and electron affinity.

-----

**Bibliography of some current Group Method publications (which also include the group parameters) for Pure Condensed-Phase Thermodynamics**

Leading reference: N. Cohen and S. W. Benson, "Estimation of heats of formation of organic compounds by additivity methods", *Chem. Rev.*, 1993, **93**, 2419-2438.

**Ionic materials**

- (1) J. A. Chermak and J. D. Rimstidt, "Estimating the thermodynamic properties ( $\Delta G_f^\circ$  and  $\Delta H_f^\circ$ ) of silicate minerals at 298 K from the sum of polyhedral contributions", *Am. Miner.*, 1989, **74**, 1023-1031.
- (2) R. G. Berman, "Internally-consistent thermodynamic data for minerals in the system  $\text{Na}_2\text{O}-\text{K}_2\text{O}-\text{CaO}-\text{MgO}-\text{FeO}-\text{Fe}_2\text{O}_3-\text{Al}_2\text{O}_3-\text{SiO}_2-\text{TiO}_2-\text{H}_2\text{O}-\text{CO}_2$ ", *J. Petrol.*, 1988, **29**, 445-522.
- (3) T. J. B. Holland, "Dependence of entropy on volume for silicate and oxide minerals: a review and predictive model", *Am. Miner.*, 1989, **74**, 5-13.
- (4) M. Ducos and H. Sannier, "Méthode d'estimation des enthalpies de formation et des enthalpies libres de formation des composés inorganiques", *Thermochim. Acta*, 1992, **196**, 27-43.
- (5) C. D. Ratkey and B. K. Harrison, "Prediction of enthalpies of formation for ionic compounds", *Ind. Eng. Chem.*, 1992, **31**, 2362-2369.
- (6) A. T. M. Golam Mostafa, James M. Eakman, Mark M. Montoya and Stephen L. Yarbrow, "Prediction of heat capacities of solid inorganic salts from group contributions", *Ind. Eng. Chem. Res.*, 1996, **35**, 343 – 348.
- (7) J. Leitner, P. Chuchvalec, D. Sedmidubsky, A. Strejc and P. Abrman, "Estimation of heat capacities of solid mixed oxides", *Thermochim. Acta*, 2003, **395**, 27-46.

**Volume, density and radii**

Leading reference: G. Piacenza, G. Jacob and R. Gallo, "The prediction of density", *Adv. Quant. Struct.-Prop. Relations.*, 2002, **3**, 67-107.

- (8) C. H. Suresh and N. Koga, "A consistent approach to atomic radii", *J. Phys. Chem. A*, 2001, **105**, 5940-5944.

- (9) Y. H. Zhao, M. H. Abraham and A. M. Zissimos, "Determination of McGowan volumes for ions and correlations with van der Waals volumes", *J. Chem. Inf. Comput. Sci.*, 2003, **43**, 1848-1854.
- (10) Y. H. Zhao, M. H. Abraham and A. M. Zissimos, "Fast calculations of van der Waals volume as a sum of atomic and bond contributions and its application to drug compounds", 2003, **68**, 7368-7373.
- (11) H. K. Roobottom, H. D. B. Jenkins, J. Passmore and L. Glasser, "Thermochemical radii of complex ions", *J. Chem. Educ.*, 1999, **76**, 1570-1573.
- (12) D. W. M. Hofmann, "Fast estimation of crystal densities", *Acta Cryst. B*, 2002, **57**, 489-493.
- (13) S. Beaucamp, N. Marchet, D. Mathieu and V. Agafonov, "Calculation of the crystal densities of molecular salts and hydrates using additive volumes for charged groups", *Acta Cryst. B*, 2003, **59**, 498-504.
- (14) H. L. Ammon, "New atom/functional group volume additivity data bases for the calculation of the crystal densities of C-, H-, N-, O-, F-, S-, P-, Cl-, and Br-containing compounds", *Struct. Chem.*, 2001, **12**, 205-212.

### Thermodynamic properties

Leading references: J. C. Dearden, "The prediction of melting point", *Adv. Quant. Struct.-Prop. Relations.*, 1999, **2**, 127-175; M. Tesconi and S. H. Yalkowsky, "Melting Point", Chap. 1 in *Handbook of Property Estimation Methods for Chemicals: Environmental and Health Sciences*, R. S. Boethling and D. Mackay, Eds., CRC Press, Boca Raton, 2000. For a considerable simplification, see also A. Jain and S. H. Yalkowsky, "Estimation of total entropy of melting of organic compounds", *Ind. Eng. Chem.*, 2004, **43**, 4376-4379.

Leading reference: M. Charton, "Phase change structure property quantitative relationships via intermolecular force parameters", *Adv. Quant. Struct.-Prop. Relations.*, 2002, **3**, 137-222 (properties: boiling point,  $T_b$ ; melting point,  $T_m$ ; critical temperature,  $T_C$ ).

- (15) C. Ouvrard and J. B. O. Mitchell, "Can we predict lattice energy from molecular structure?", *Acta Cryst. B*, 2003, **59**, 676-685.

- (16) J. S. Chickos and W. E. Acree, Jr., "Enthalpies of sublimation of organic and organometallic compounds. 1920-2001". *J. Phys. Chem. Ref. Data*, 2002, **31**, 537-698 (includes group property table for  $C_p$  of condensed phase).
- (17) J. S. Chickos, W. E. Acree, Jr. and J. F. Liebman, "Estimating solid-liquid phase change enthalpies and entropies", *J. Phys. Chem. Ref. Data*, 1999, **28**, 1535-1673. But, for a much simplified procedure, see A. Jain, G. Yang and S. H. Yalkowsky, "Estimation of total entropy of melting of organic compounds, *Ind. Eng. Chem.*, **2004**, 4376-4379.
- (18) W. A. Wakeham, G. St. Cholakov and R. P. Stateva, "Liquid density and critical properties of hydrocarbons estimated from molecular structure", *Chem. Eng. Data*, 2002, **47**, 559-570.
- (19) G. St. Cholakov, R. P. Stateva and W. A. Wakeham, "Estimation of normal boiling points of hydrocarbons from descriptors of molecular structure", *Fluid Phase Equilib.*, 1999, **163**, 21-42.
- (20) S. E. Stein and R. L. Brown, "Estimation of normal boiling points from group contributions", *Chem. Inf. Comput. Sci.*, 1994, **34**, 581-587.
- (21) E. S. Domalski and E. D. Hearing, "Estimation of the thermodynamic properties of hydrocarbons at 298.15 K", *J. Phys. Chem. Ref. Data*, 1988, **17**, 1637-1678.
- (22) G. J. Kabo, A. A. Kozyro and V. V. Diky, "Additivity of thermodynamic properties of organic compounds in the crystalline state. 1. Additive calculations for thermodynamic properties of alkanes, alkenes, alkanols, and alkanones", 1995, *J. Chem. Eng. Data*, 1996, **40**, 160-166.
- (23) J. S. Chickos and W. E. Acree, Jr., "Total phase change entropies and enthalpies. An update on their estimation and applications to the estimations of amphiphilic fluorocarbon-hydrocarbon molecules", *Thermochim. Acta*, 2003, **395**, 59-113.
