# Supplementary material for: Predictive thermodynamics for condensed phases
Source: Royal Society of Chemistry journal article supplement (doi:10.1039/b501741f), 2005-01-01
Supplement: b501741f-tables.pdf [file b501741f-tables.pdf]

## Predictive Thermodynamics for Condensed Phases

*Leslie Glasser*\*

Nanochemistry Research Institute, Dept. of Applied Chemistry, Curtin University of  
Technology, GPO Box U1987, Perth WA, 6845, Australia

Telephone: +61 8 6293-1202      Fax: +61 8 9266-4699

E-mail: [l.glasser@exchange.curtin.edu.au](mailto:l.glasser@exchange.curtin.edu.au)

and

*H. Donald Brooke Jenkins*\*

Department of Chemistry, University of Warwick, Coventry CV4 7AL, West  
Midlands, United Kingdom

Telephone: +44 2476 523-265; +44 2476 466747      Fax: +44 2476 466-747

E-mail: [Don.Jenkins@warwick.ac.uk](mailto:Don.Jenkins@warwick.ac.uk)

\*Corresponding authors

### Supplementary Information

**Table S1:** Correlations observed by Westwell et al.<sup>7</sup> between various thermodynamic parameters fitted to the linear relationship:  $y = mx + c$

| $y^a / \text{kJ mol}^{-1}$ | $x^b$           | $m$                                        | $c$                           | $R^c$ |
|----------------------------|-----------------|--------------------------------------------|-------------------------------|-------|
| $\Delta_{sub}H$            | $T_m$           | $0.188 / \text{kJ mol}^{-1} \text{K}^{-1}$ | $0.522 / \text{kJ mol}^{-1}$  | 0.95  |
| $\Delta_{vap}H$            | $T_b$           | $0.108 / \text{kJ mol}^{-1} \text{K}^{-1}$ | $- 5.08 / \text{kJ mol}^{-1}$ | 0.99  |
| $\Delta_{vap}H$            | $T_m$           | $0.166 / \text{kJ mol}^{-1} \text{K}^{-1}$ | $- 3.99 / \text{kJ mol}^{-1}$ | 0.93  |
| $\Delta_{sub}H$            | $T_b$           | $0.119 / \text{kJ mol}^{-1} \text{K}^{-1}$ | $1.38 / \text{kJ mol}^{-1}$   | 0.98  |
| $\Delta_{vap}H$            | $\Delta_{sub}H$ | 0.889                                      | $- 4.75 / \text{kJ mol}^{-1}$ | 0.99  |

<sup>a</sup>  $\Delta_{sub}H =$  sublimation enthalpy /  $\text{kJ mol}^{-1}$ ;  $\Delta_{vap}H / \text{kJ mol}^{-1} =$  vaporization enthalpy.

<sup>b</sup>  $T_m =$  melting temperature / K;  $T_b =$  boiling temperature / K.

<sup>c</sup> Correlation coefficient.

**Table S2:** Constants for use in VBT equations<sup>18</sup> (12) and (13) for lattice energy /  $\text{kJ mol}^{-1}$ . If  $U_{POT} < 5\,000 \text{ kJ mol}^{-1}$  then:  $U_{POT} = 2I [\alpha/V_m^{1/3} + \beta]$  or  $U_{POT} = \gamma (\rho_m / M_m)^{1/3} + \delta$ . If  $U_{POT} > 5\,000 \text{ kJ mol}^{-1}$ , then:  $U_{POT} = AI(2I/V_m)^{1/3}$  where  $A = 121.4 \text{ kJ mol}^{-1} \text{ nm}$ , where  $I$  is the lattice ionic strength factor and  $V_m$  is the formula unit volume.

| Salt<br>(charge ratio)                                     | $I$ , ionic<br>strength<br>factor | $\alpha$<br>/ $\text{kJ mol}^{-1} \text{ nm}$ | $\beta$<br>/ $\text{kJ mol}^{-1}$ | $\gamma$<br>/ $\text{kJ mol}^{-1} \text{ cm}$ | $\delta$<br>/ $\text{kJ mol}^{-1}$ |
|------------------------------------------------------------|-----------------------------------|-----------------------------------------------|-----------------------------------|-----------------------------------------------|------------------------------------|
| MX (1:1)                                                   | 1                                 | 117.3                                         | 51.9                              | 1981.2                                        | 103.8                              |
| M <sub>2</sub> X (1:2)                                     | 3                                 | 165.3                                         | -29.8                             | 8375.6                                        | -178.8                             |
| MX <sub>2</sub> (2:1)                                      | 3                                 | 133.5                                         | 60.9                              | 6764.3                                        | 365.4                              |
| MX (2:2)                                                   | 4                                 | 106.3                                         | 74.5                              | 7181.5                                        | 596.0                              |
| general<br>formula:<br>M <sub>p</sub> X <sub>q</sub> (q:p) | $\frac{1}{2}(pq^2 + qp^2)$        | 138.7                                         | 27.6                              | $2342.6 \cdot I$                              | 55.2·I                             |

**Table S3a:** Unconstrained and constrained ( $c = 0$ ) linear relationships<sup>8</sup> between standard entropy,  $S_{298}^{\circ} / \text{J K}^{-1} \text{mol}^{-1}$  and formula unit volume,  $V_m / \text{nm}^3$  for inorganic solids.

| compound type             | number of compounds considered | fitted parameters for equations:                                                |                                          |                                               |                                                                             | $S_{298}^{\circ}$<br>= $kV_m + c$                                           |
|---------------------------|--------------------------------|---------------------------------------------------------------------------------|------------------------------------------|-----------------------------------------------|-----------------------------------------------------------------------------|-----------------------------------------------------------------------------|
|                           |                                | $S_{298}^{\circ} = kV_m + c$ (6)                                                | $S_{298}^{\circ} = k'(M/\rho) + c$       |                                               |                                                                             |                                                                             |
|                           |                                | k<br>/ $\text{J K}^{-1} \text{mol}^{-1}$<br>( $\text{nm}^3$<br>formula<br>unit) | k'<br>/ $\text{J K}^{-1} \text{cm}^{-3}$ | c /<br>$\text{J K}^{-1}$<br>$\text{mol}^{-1}$ | correlation<br>coefficient<br>for<br>volume-<br>based<br>equation,<br>$R^2$ | average<br>unsigned %<br>error for<br>$S_{298}^{\circ}$ , using<br>equation |
| anhydrous<br>ionic solids | 65                             | $1\,360 \pm 56$                                                                 | $2.258 \pm 0.093$                        | $15 \pm 6$                                    | 0.90                                                                        | 11.5                                                                        |
|                           |                                | $1\,481 \pm 27$                                                                 | $2.458 \pm 0.045$                        | 0                                             | 0.88                                                                        | 12.6                                                                        |
| hydrated<br>ionic solids  | 67                             | $1\,579 \pm 30$                                                                 | $2.621 \pm 0.050$                        | $6 \pm 6$                                     | 0.98                                                                        | 7.4                                                                         |
|                           |                                | $1\,606 \pm 14$                                                                 | $2.666 \pm 0.023$                        | 0                                             | 0.96                                                                        | 7.4                                                                         |

**Table S3b:** Unconstrained and constrained ( $c = 0$ ) linear relationships<sup>8</sup> between standard entropy,  $S_{298}^{\circ} / \text{J K}^{-1} \text{mol}^{-1}$  and formula unit volume,  $V_m / \text{nm}^3$  for minerals.

| mineral type | number of compounds considered | $S_{298}^{\circ} = kV_m + c$ (6)                                          |                                          |                                     |                                |
|--------------|--------------------------------|---------------------------------------------------------------------------|------------------------------------------|-------------------------------------|--------------------------------|
|              |                                | k /<br>$\text{J K}^{-1} \text{mol}^{-1}$ ( $\text{nm}^3$<br>formula unit) | c /<br>$\text{J K}^{-1} \text{mol}^{-1}$ | correlation<br>coefficient<br>$R^2$ | average<br>unsigned %<br>error |
| minerals     | 99                             | $1\,262 \pm 28$                                                           | $13 \pm 5$                               | 0.95                                | 12.6                           |
|              |                                | $1\,317 \pm 18$                                                           | 0                                        | 0.94                                | 11.6                           |
| silicates    | 53                             | $1\,303 \pm 30$                                                           | $0 \pm 5$                                | 0.97                                | 9.1                            |

|                                             |    |             |          |      |      |
|---------------------------------------------|----|-------------|----------|------|------|
| combined,<br>subset of data<br>for minerals |    | 1 305 ± 16  | 0        | 0.95 | 9.1  |
| ortho and ring<br>structure<br>silicates    | 20 | 1 265 ± 99  | 10 ± 13  | 0.89 | 13.3 |
| subset of data<br>for silicates             |    | 1 338 ± 39  | 0        | 0.84 | 12.1 |
| chain and band<br>structure<br>silicates    | 11 | 1 176 ± 56  | 9 ± 9    | 0.98 | 9.9  |
| subset of data<br>for silicates             |    | 1 216 ± 36  | 0        | 0.88 | 10.9 |
| sheet structure<br>silicates                | 8  | 1 490 ± 205 | -51 ± 43 | 0.88 | 4.8  |
| subset of data<br>for silicates             |    | 1 251 ± 32  | 0        | 0.73 | 5.5  |
| framework<br>structure<br>silicates         | 14 | 1 384 ± 27  | -10 ± 6  | 0.99 | 5.1  |
| subset of data<br>for silicates             |    | 1 350 ± 16  | 0        | 0.92 | 4.5  |

**Table S3c:** Unconstrained linear relationships<sup>9</sup> between standard entropy,  $S_{298}^{\circ} / \text{J K}^{-1} \text{mol}^{-1}$ , and volume per molecule,  $V_m$ , or density,  $\rho / \text{g cm}^{-3}$ , for condensed-phase organics.

| compound type                                                         | number of compounds considered | $S_{298}^{\circ} = kV_m + c$ (6) and $S_{298}^{\circ} = k'(\text{M}/\rho) + c$         |                                                                       |                                          |                                  | average unsigned % error |
|-----------------------------------------------------------------------|--------------------------------|----------------------------------------------------------------------------------------|-----------------------------------------------------------------------|------------------------------------------|----------------------------------|--------------------------|
|                                                                       |                                | [ $V_m$ -based]<br>k /<br>$\text{J K}^{-1} \text{mol}^{-1} \text{nm}^{-3}$<br>molecule | [ $\text{M}/\rho$ -based]<br>k' /<br>$\text{J K}^{-1} \text{cm}^{-3}$ | c /<br>$\text{J K}^{-1} \text{mol}^{-1}$ | correlation coefficient<br>$R^2$ |                          |
| Liquid n-paraffins<br>( $\text{C}_5$ - $\text{C}_{16}$ ) <sup>a</sup> | 12                             | 1 212.0 ± 4.2                                                                          | 2.012 ± 0.007                                                         | 32.1 ± 1.5                               | 1.00                             | 0.25                     |
| Liquid n-alcohols ( $\text{C}_1$ - $\text{C}_{11}$ ) <sup>a</sup>     | 11                             | 1 174.5 ± 3.5                                                                          | 1.949 ± 0.006                                                         | 46.0 ± 0.8                               | 1.00                             | 0.34                     |
| Organic liquids                                                       | 1 496                          | 1 133 ± 7                                                                              | 1.881 ± 0.011                                                         | 44 ± 2                                   | 0.95                             | 5.7                      |

|                |     |              |                   |            |      |      |
|----------------|-----|--------------|-------------------|------------|------|------|
| Organic solids | 100 | $774 \pm 21$ | $1.285 \pm 0.035$ | $57 \pm 6$ | 0.93 | 10.4 |
|----------------|-----|--------------|-------------------|------------|------|------|
